# Supplementary material for: Simultaneous sensing of intracellular microRNAs with a multi-functionalized carbon nitride nanosheet probe
Source: Royal Society of Chemistry journal article supplement (doi:10.1039/c4cc05768f), 2014-09-16
Supplement: c4cc05768f1.pdf [file c4cc05768f1.pdf]

Electronic Supplementary Information (ESI) for Chemical Communications  
This journal is (c) The Royal Society of Chemistry 2014

## Simultaneous sensing of intracellular microRNAs with a multi-functionalized carbon nitride nanosheet probe†

Xianjiu Liao, Quanbo Wang and Huangxian Ju\*

State Key Laboratory of Analytical Chemistry for Life Science, School of Chemistry  
and Chemical Engineering, Nanjing University, Nanjing 210093, P.R. China

### Experimental

**Materials and reagents.** Graphene oxide (GO) was obtained from XFNano Materials Tech Co., Ltd. (Nanjing, China). HepG2, A549 and HaCaT cells, 3-(4,5-dimethylthiazol-2-yl)-2-diphenyltetrazolium bromide (MTT), Annexin V-FITC, propidium iodide (PI) and pH 7.4 binding buffer were from KeyGen Biotech. Co. Ltd (Nanjing, China). DNase I endonuclease was from Thermo Fisher Scientific Inc. (USA), and ssDNA binding protein (SSB) was from Promega Corporation (USA). Lipofectamine 2000 (Lp2000), serum-free medium (Opti-MEM), Hoechst 333342 as nuclear tracker and LysoTracker Green DND-26 as endosomal/lysosomal tracker were obtained from Invitrogen Corporation (USA). Folate (FA) and 2-mercaptoethanol were obtained from Sigma-Aldrich Inc. (USA). DNA hybridization buffer (HB) was Tris-HCl buffer (20 mM, containing 100 mM NaCl, 5.0 mM KCl, and 5.0 mM MgCl<sub>2</sub>, pH 7.4). HepG2 and HaCaT cells were cultured in Dulbecco's modified Eagle's medium (DMEM, GIBCO) supplemented with 10% fetal calf serum, penicillin (80 U mL<sup>-1</sup>), and streptomycin (80 µg mL<sup>-1</sup>) at 37 °C in a humidified atmosphere containing 5 % CO<sub>2</sub>, while Opti-MEM was used for cell transfection. Carbon nanosphere (CNS, 110 nm) was prepared according to the literature.<sup>S1</sup>

Ultrapure water obtained from a Millipore water purification system ( $\geq 18$  M $\Omega$ , Milli-Q, Millipore) was used in all runs. All RNA and DNA sequences (Table S1) were purchased from Shanghai GenePharma Co., Ltd. and Sangon Biological Engineering Technology Co., Ltd. (Shanghai, China), respectively.

Table S1. Oligonucleotides employed in this work

| Oligonucleotides                 | Oligonucleotide sequences         |
|----------------------------------|-----------------------------------|
| Cy3-ssDNA (probe 1,P1)           | 5'-Cy3-AACGGAACCACTAGTGACTTG-3'   |
| miRNA-224 (target 1,T1)          | 5'-CAAGUCACUAGUGGUUCCGUU-3'       |
| single-base mismatched T1 (smT1) | 5'-CAAGUCACUCGUGGUUCCGUU-3'       |
| three-base mismatched T1 (tmT1)  | 5'-CAAGUCGCUAGAGGUUACGUU-3'       |
| inhibitor-224                    | 5'-AACGGAACCACUAGUGACUUG-3'       |
| background calibration T1        | 5'-Cy3-AAAAAAAAAAAAAAAAAAAA-3'    |
| Cy5-ssDNA (P2)                   | 5'-Cy5-CTATCTGCACTAGATGCACCTTA-3' |
| miRNA-18a (T2)                   | 5'-UAAGGUGCAUCUAGUGCAGAUAG-3'     |
| single-base mismatched T2 (smT2) | 5'-UAAGGUGCAUCGAGUGCAGAUAG-3'     |
| three-base mismatched T2 (tmT2)  | 5'-UAAGGAGCAUCUCGUGCAUUAUAG-3'    |
| inhibitor-18a                    | 5'-CUAUCUGCACUAGAUGCACCUUA-3'     |
| background calibration T2        | 5'-Cy5-AAAAAAAAAAAAAAAAAAAA-3'    |
| non-complementary RNA            | 5'-UGGAGUGUGACAAUGGUGUUUG-3'      |
| NH <sub>2</sub> -Poly A          | 5'-NH <sub>2</sub> -AAAAAA-3'     |
| Cy5-Poly A                       | 5'-Cy5-AAAAAA-3'                  |

Mismatched bases are highlighted in italic type.

**Apparatus.** Laser scanning confocal microscopic (LSCM) images were gained on a TCS SP5 laser scanning confocal microscope (Leica, Germany). Transmission electron micrograph (TEM) was obtained using a JEM-2100 TEM instrument (JEOL, Japan). Zeta potential analysis was performed on a Zetasizer (Nano-Z, Malvern, UK). Flow cytometric (FCM) analysis was

performed on a Coulter FC-500 flow cytometer (Beckman-Coulter, USA). UV-vis absorption spectra were obtained with a UV-3600 UV-vis-NIR spectrophotometer (Shimadzu, Japan). Fluorescence (FL) spectra were recorded on a RF-5301PC spectrofluorometer (Shimadzu, Japan). MTT assay was performed on a microplate reader (680, Bio-Rad, USA). Cell number was determined using a Petroff-Hausser cell counter (USA). Dynamic light scattering (DLS) was observed on a 90 Plus/ BI-MAS equipment (Brook haven, USA). X-ray diffraction (XRD) pattern was recorded on a D8 Advance X-ray diffractometer (Bruker, Germany) using Cu K $\alpha$  radiation ( $\lambda = 1.5418 \text{ \AA}$ ). X-ray photoelectron spectroscopic (XPS) measurement was performed using an ESCALAB 250 spectrometer (Thermo-VG Scientific, USA) with an ultrahigh vacuum generator.

**Synthesis of CNNS.** Carbon nitride nanosheet (CNNS) was prepared from bulk graphitic-phase carbon nitride (g-C<sub>3</sub>N<sub>4</sub>) according to the literature.<sup>S2</sup> Firstly, bulk g-C<sub>3</sub>N<sub>4</sub> was prepared by polymerization of melamine molecules at high temperature. Then CNNS was prepared by sonicating the bulk g-C<sub>3</sub>N<sub>4</sub> in water. The sonicated mixture was first centrifuged at 5,000 rpm to remove aggregated bulk g-C<sub>3</sub>N<sub>4</sub> particles and obtain the CNNS suspension, which was centrifuged at 15,000 rpm to obtain CNNS. The CNNS was redispersed in ultrapure water to a concentration of 1.5 mg mL<sup>-1</sup>.

**Preparation of functionalized CNNS probes.** The FA-Poly A was firstly prepared by adding 3.2 mg EDC and 4.8 mg NHS in 7.91 mL pH 6.0 MES containing 6  $\mu$ M FA. After the mixture was stirred at room temperature for 5 min, 10  $\mu$ L 2-mercaptoethanol was added to quench the excess EDC. Then, 80  $\mu$ L 300  $\mu$ M NH<sub>2</sub>-Poly A was added to the mixture and stirred at room temperature for 4 h.<sup>S3</sup> The concentration of the obtained FA-Poly A was 3  $\mu$ M, expressed as the amount of NH<sub>2</sub>-Poly A.

The multiple dye-ssDNA and folate functionalized CNNS probe (mf-CNNS probe) were prepared as follows: 400  $\mu\text{L}$  1.5  $\text{mg mL}^{-1}$  CNNS was diluted with 2.52  $\text{mL}$  20  $\text{mM}$  pH 7.4 Tris-HCl buffer and sonicated for 5 min to obtain a homogeneous dispersion. Subsequently, 15  $\mu\text{L}$  10  $\mu\text{M}$  Cy5-ssDNA and 15  $\mu\text{L}$  10  $\mu\text{M}$  Cy3-ssDNA were added to the dispersion and stirred for 5 min at room temperature, then 50  $\mu\text{L}$  3  $\mu\text{M}$  fresh FA-Poly A was added to the mixture and stirred another 5 min. After the mixture was centrifuged at 15000 rpm for 20 min, the resulting mf-CNNS probe was redispersed in 400  $\mu\text{L}$  or 15  $\mu\text{L}$  20  $\text{mM}$  pH 7.4 Tris-HCl buffer and stored at 4  $^{\circ}\text{C}$ , the concentration of mf-CNNS probe was 1.5  $\text{mg mL}^{-1}$  or 40  $\text{mg mL}^{-1}$ , expressed as the amount of CNNS. The supernatant was collected to characterize the amount of dye-ssDNA loaded on CNNS by FL detection with a standard curve method. The average quantity of both Cy5-ssDNA and Cy3-ssDNA loaded on 1.0  $\mu\text{g mL}^{-1}$  CNNS was 0.23 nM.

The single dye-ssDNA and folate functionalized CNNS probe (f-CNNS probe) was prepared with a similar process as mf-CNNS probe using 200  $\mu\text{L}$  1.5  $\text{mg mL}^{-1}$  CNNS, 15  $\mu\text{L}$  10  $\mu\text{M}$  Cy3-ssDNA ( $f_1$ -CNNS probe) or Cy5-ssDNA ( $f_2$ -CNNS probe). The background calibration probes were also prepared using corresponding background calibration T1 or T2 instead of dye-ssDNA. The folate functionalized CNNS (f-CNNS) was prepared by mixing the dispersion of CNNS and folate solution, and the m-CNNS probe was prepared by mixing the CNNS dispersion and Cy5-ssDNA and Cy3-ssDNA solutions with a similar process. The f-CNS and f-GO were also prepared by mixing folate solution with the dispersion of CNS or GO.

**MTT assay.**  $1.0 \times 10^4$  HepG2 cells were seeded in a 96-well plate containing 100  $\mu\text{L}$  Opti-MEM in each well for 12 h. These cells were incubated with 100  $\mu\text{L}$  Opti-MEM as control and 100  $\mu\text{L}$  Opti-MEM containing f-CNNS (50 to 800  $\mu\text{g mL}^{-1}$ ), 200  $\mu\text{g mL}^{-1}$  f-CNS or 200  $\mu\text{g mL}^{-1}$  f-GO for 3 h. 50  $\mu\text{L}$  MTT (1  $\text{mg mL}^{-1}$ ) was then added to each well. After incubation for 4 h, the media

were removed, and 150  $\mu\text{L}$  dimethylsulfoxide was added to solubilize the formed formazan dye. After 15 min, the absorbance of each well was measured at 490 nm. The relative cell viability (%) was calculated by  $(A_{\text{test}}/A_{\text{control}}) \times 100$ .

**Gel electrophoresis experiments.** The gel electrophoresis was performed as follows: 14  $\mu\text{L}$  sample was added in the mixture of 3  $\mu\text{L}$  loading buffer and 3  $\mu\text{L}$  GelRed. The mixture was injected into polyacrylamide hydrogel in tris-borate-EDTA (TBE) buffer. Electrophoresis was carried out at 90 V in TBE buffer for 1 h. The resulting board was observed under UV irradiation.

**Cell-specific transfection.**  $1.0 \times 10^4$  HepG2 cells were cultivated for 12 h in 35-mm confocal dish. Then the cells were treated with 500  $\mu\text{L}$  Opti-MEM containing 200  $\mu\text{g mL}^{-1}$  f-CNNS or CNNS for different times. As control, A549 and HaCaT cells were treated with 500  $\mu\text{L}$  Opti-MEM containing 200  $\mu\text{g mL}^{-1}$  f-CNNS for different times.

Confocal microscopy was also used to optimize the incubation time of mf-CNNS probe. With a similar process, the HepG2 cells were treated with 200  $\mu\text{g mL}^{-1}$  mf-CNNS probe for different times. The amount of mf-CNNS probe was optimized by incubating HepG2 cells with different amounts of mf-CNNS probe for 3 h.

**Subcellular localization of mf-CNNS probe.** The subcellular localization of mf-CNNS probe was observed with confocal microscopy by incubating HepG2 cells with 200  $\mu\text{g mL}^{-1}$  mf-CNNS probe for 3 h and then 1.0  $\mu\text{M}$  Hoechst 333342 for 20 min, or 200  $\mu\text{g mL}^{-1}$  mf-CNNS probe or f-CNNS for 3 h and then 1.0  $\mu\text{M}$  LysoTracker Green DND-26 for 20 min. Hoechst 333342 was excited at 405 nm to collect the emission from 410 to 480 nm, while LysoTracker DND-26 was excited at 488 nm, and the emission was collected from 500 to 580 nm.

**Confocal microscopic analysis of intracellular miRNAs.**  $1.0 \times 10^4$  HepG2 cells were cultivated in 35-mm confocal dish for 12 h and treated with 500  $\mu$ L Opti-MEM, or 500  $\mu$ L Opti-MEM containing 50 nM inhibitor-18a and inhibitor-224, 50 nM inhibitor-224, or 50 nM inhibitor-18a for 48 h at 37 °C. These HepG2 cells and  $1.0 \times 10^4$  HeLa cells treated with 500  $\mu$ L Opti-MEM were then transfected with 200  $\mu$ g mL<sup>-1</sup> mf-CNNS probe or background calibration probe at 37 °C for 3 h, respectively. After washing with PBS, these cells were used to perform confocal imaging analysis for multiple miRNAs detection. The signal from background calibration probe was used to eliminate background by adjusting the “offset” button of LSCM. The FL intensity was digitized by Leica Application Suite Advanced FL (LAS-AF) software.

**Flow cytometric analysis of intracellular miRNAs.**  $1.0 \times 10^5$  HepG2 or HeLa cells were cultivated in 60 mm culture dish for 12 h and treated with 5mL Opti-MEM containing different miRNA inhibitors for 48 h, and then with fresh 5mL Opti-MEM containing 100  $\mu$ g mL<sup>-1</sup> f<sub>1</sub>-CNNS probe or f<sub>2</sub>-CNNS probe for 3 h to perform the flow cytometric analysis. The background calibration probe transfected cells were also collected for background calibration.

## Characterization of CNNS and mf-CNNS probe

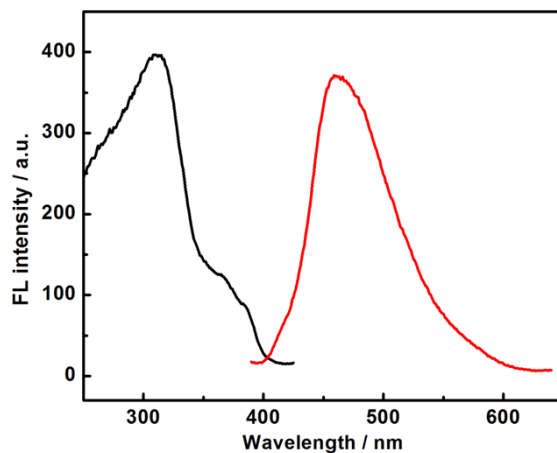

**Fig. S1** FL excitation and emission spectra of 150  $\mu\text{g mL}^{-1}$  CNNS.

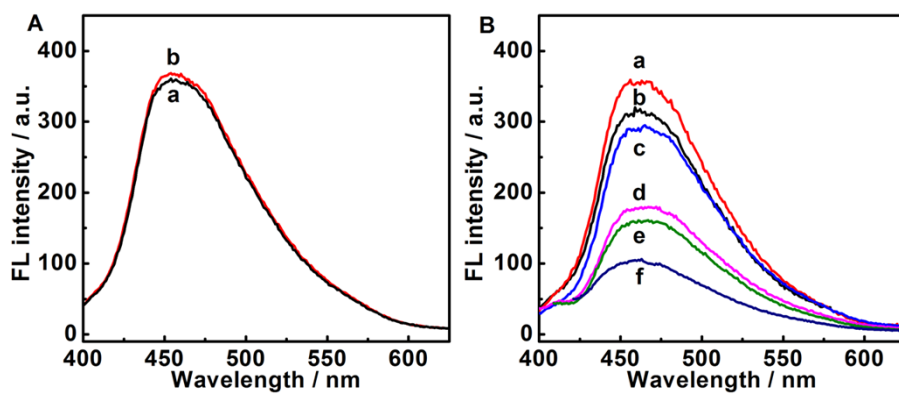

**Fig. S2** FL spectra of (A) 150  $\mu\text{g mL}^{-1}$  CNNS (a) and mf-CNNS probe (b), and (B) 150  $\mu\text{g mL}^{-1}$  CNNS with excitation wavelength of (a) 310, (b) 290, (c) 330, (d) 350, (e) 370 and (f) 390 nm.

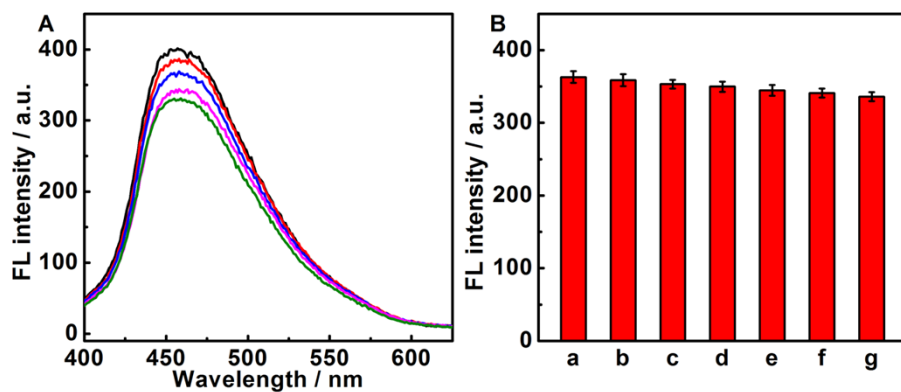

Fig. S3 (A) FL spectra of  $150 \mu\text{g mL}^{-1}$  CNNS at 15, 25, 35, 45 and 55 °C (from top to bottom). (B) FL intensity of  $150 \mu\text{g mL}^{-1}$  CNNS in 20 mM pH 7.4 Tris-HCl buffer containing 100, 200, 400, 600, 800, 1000 and 1500 mM NaCl (from a to g).

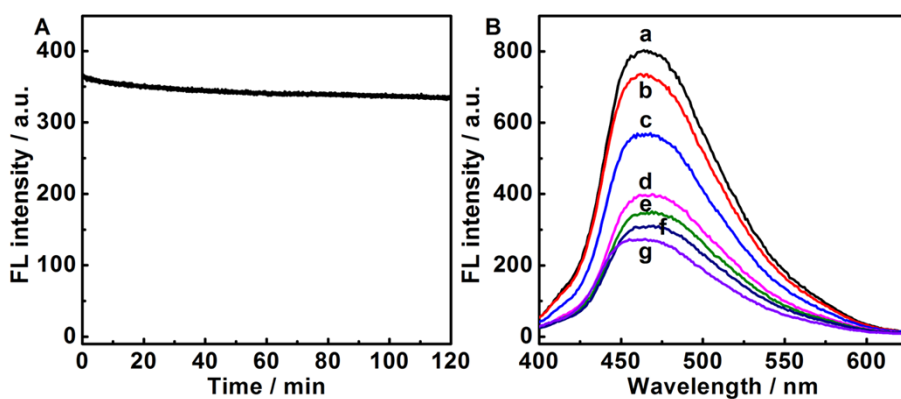

Fig. S4 FL intensity of  $150 \mu\text{g mL}^{-1}$  CNNS at (A) different times, and (B) FL spectra at pH 3, 5, 6, 7, 8, 9 and 11 (from a to g).

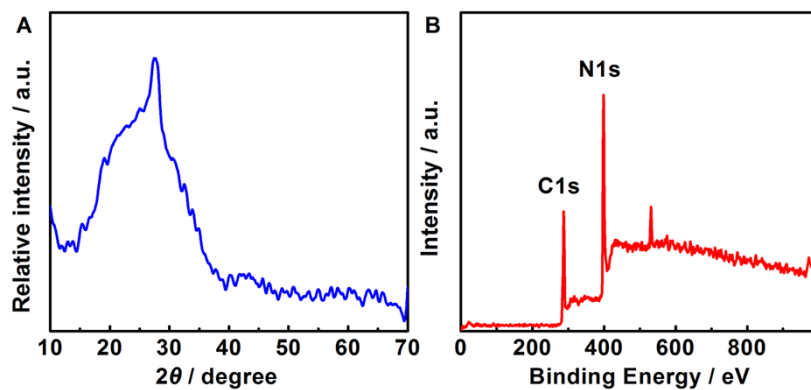

**Fig. S5** (A) X-ray diffraction pattern and (B) X-ray photoelectron spectrum of CNNS.



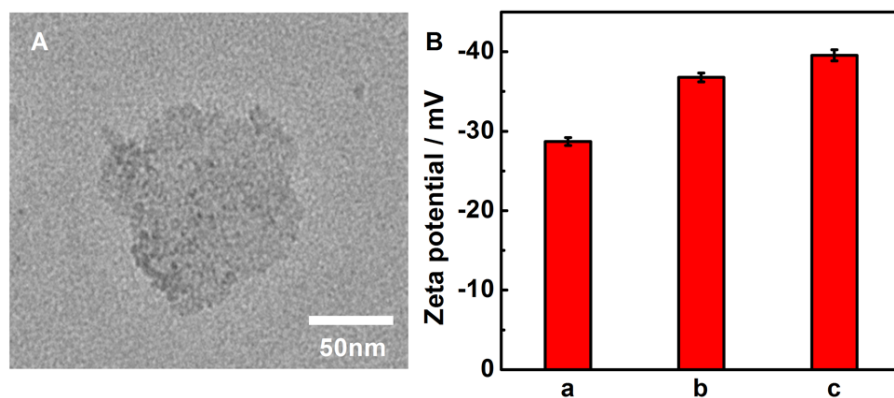

**Fig. S6** (A) TEM of CNNS and (B) zeta potentials of 200  $\mu\text{g mL}^{-1}$  CNNS (a), m-CNNS probe (b) and mf-CNNS probe (c).

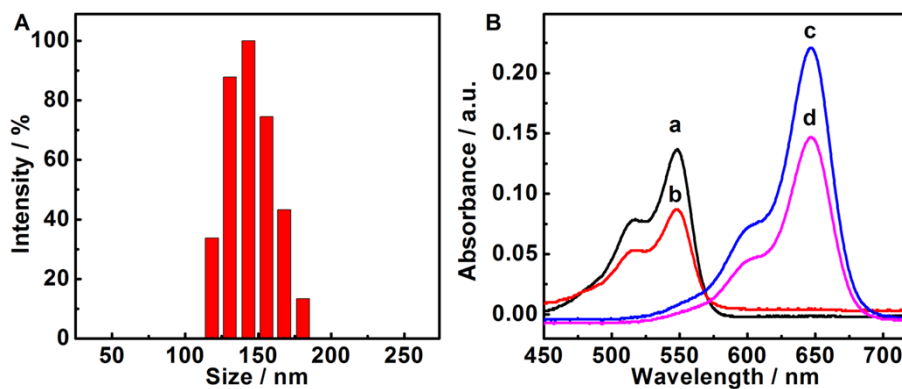

**Fig. S7** (A) DLS characterization of 150  $\mu\text{g mL}^{-1}$  CNNS, and (B) UV-visible absorption spectra of 500 nM Cy3-ssDNA in the absence (a) and presence (b) of 1.0  $\text{mg mL}^{-1}$  CNNS, and 500 nM Cy5-ssDNA in the absence (c) and presence (d) of 1.0  $\text{mg mL}^{-1}$  CNNS. Curves (b) and (d) were measured using 1.0  $\text{mg mL}^{-1}$  CNNS as blank.

## In vitro fluorescence quenching and recovery for miRNA sensing

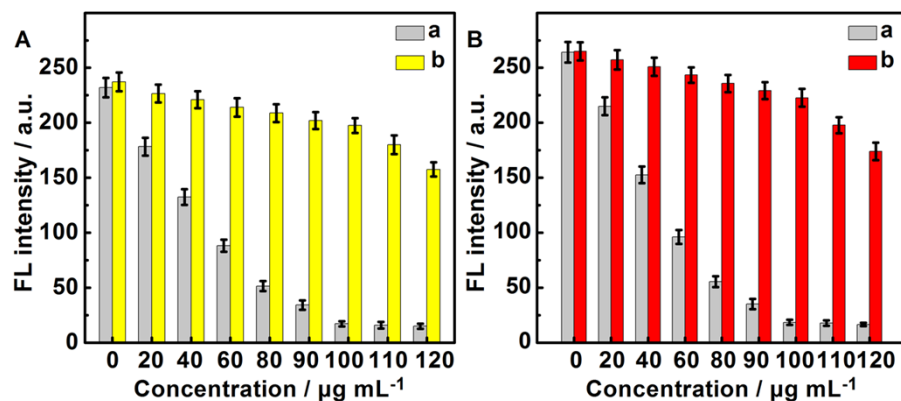

**Fig. S8** FL intensity of (A) 50 nM Cy3-ssDNA after incubation with 0, 20, 40, 60, 80, 100, 110 and 120  $\mu\text{g mL}^{-1}$  CNNS for 5 min (a) and then 250 nM miRNA-224 at 37 °C for 1 h (b), and (B) 50 nM Cy5-ssDNA after incubation with 0, 20, 40, 60, 80, 100, 110 and 120  $\mu\text{g mL}^{-1}$  CNNS for 5 min (a) and then 250 nM miRNA-18a at 37 °C for 1 h (b). The emission of Cy3/Cy5 is monitored at 567/667 nm with an excitation wavelength of 543/640 nm. All measurements are performed in HB.

## Gel electrophoresis

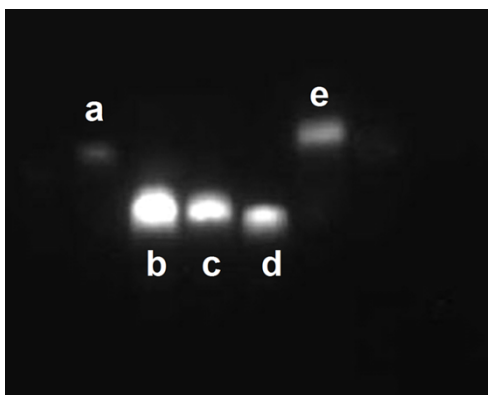

**Fig. S9** Electrophoresis image of 5.0  $\mu\text{M}$  miRNA-224 (a), supernatants obtained after mixing 5.0  $\mu\text{M}$  miRNA-224, 5.0  $\mu\text{M}$  miRNA-224 and 20  $\text{mg mL}^{-1}$  mf-CNNS probe (b), 5.0  $\mu\text{M}$  miRNA-18a and 10  $\text{mg mL}^{-1}$  f<sub>2</sub>-CNNS probe (c), and 5.0  $\mu\text{M}$  miRNA-224 and 10  $\text{mg mL}^{-1}$  f<sub>1</sub>-CNNS probe at 37 °C for 1 h (d), and 5.0  $\mu\text{M}$  Cy3-ssDNA (e).

## Specificity of miRNA sensing

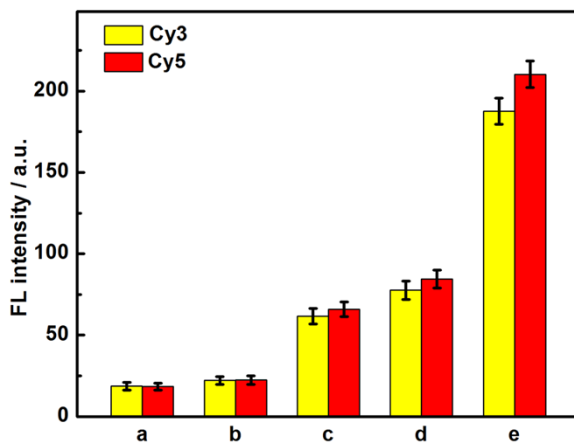

**Fig. S10** FL intensity of 200  $\mu\text{g mL}^{-1}$  mf-CNNS probe (a) after incubation with 250 nM non-complementary RNA (b), 250 nM tmT1/tmT2 (c), 250 nM smT1/smT2 (d) and 250 nM T1 /T2 (e) at 37 °C for 1 h. The emission of Cy3/Cy5 is monitored at 567/667 nm with an excitation wavelength of 543/640 nm. All measurements are performed in HB.

## Protection properties of CNNS

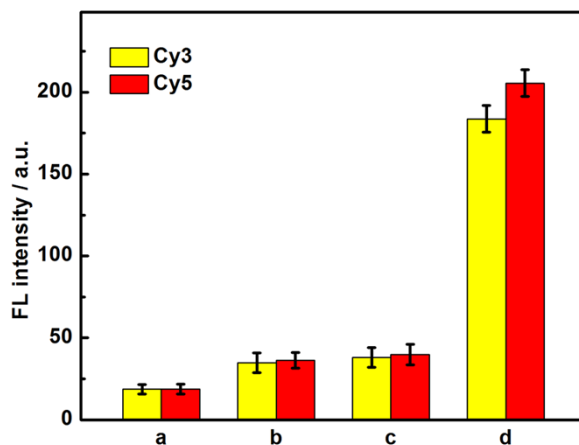

**Fig. S11** FL intensity of mf-CNNS probe (a), mf-CNNS probe after incubation with 250 nM SSB (b), 1.0 U DNase I (c) and 250 nM T1 /T2 (d) at 37 °C for 1 h. The emission of Cy3/Cy5 is monitored at 567/667 nm with an excitation wavelength of 543/640 nm. All measurements are performed in HB.

## Cytotoxicity of CNNS with MTT assay

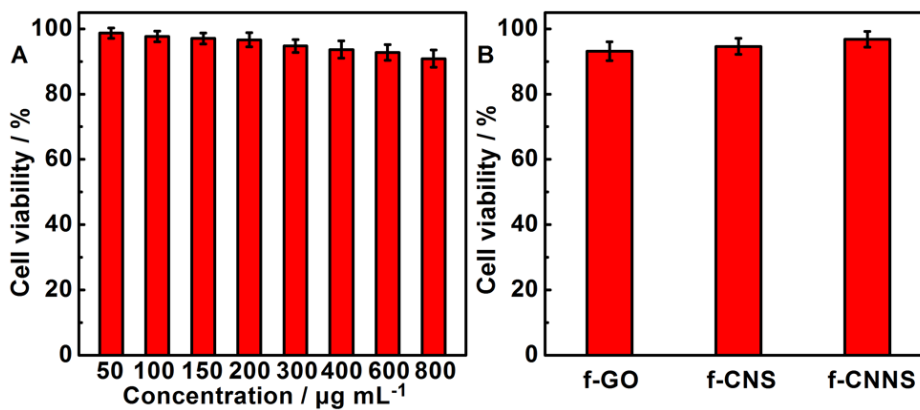

**Fig. S12** Viability of HepG2 cells after incubation with (A) 50, 100, 150, 200, 300, 400, 600 or 800  $\mu\text{g mL}^{-1}$  f-CNNS, and (B) 200  $\mu\text{g mL}^{-1}$  f-CNNS, f-CNS or f-GO at 37 °C for 3 h.

## Specific delivery of f-CNNS

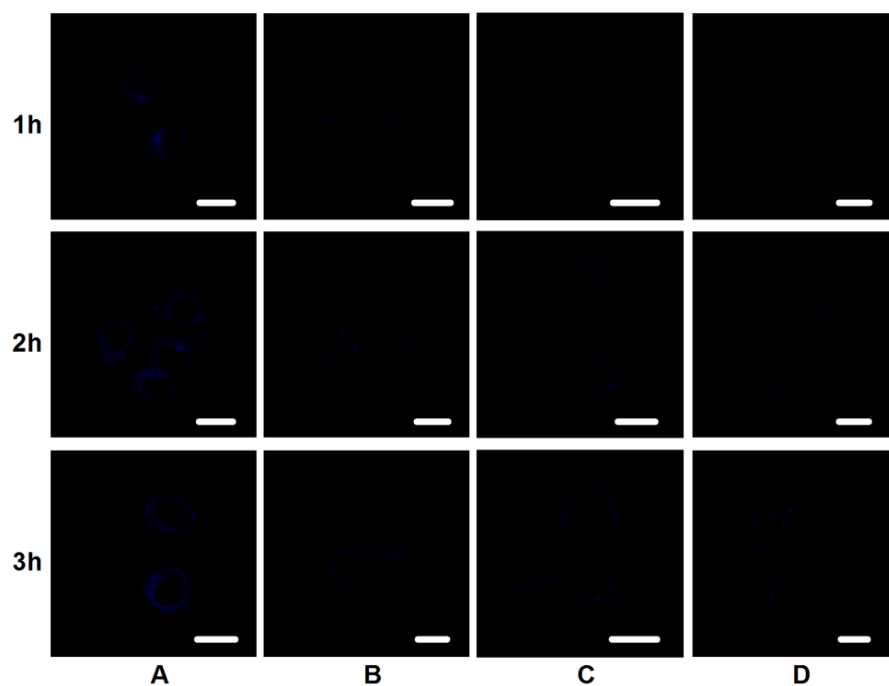

**Fig. S13** Confocal FL images of HepG2 cell transfected with  $200 \mu\text{g mL}^{-1}$  (A) f-CNNS and (B) CNNS, and (C) A549 and (D) HaCaT cell transfected with  $200 \mu\text{g mL}^{-1}$  f-CNNS at  $37^\circ\text{C}$  for 1, 2 and 3 h. Scale bars:  $20 \mu\text{m}$ .

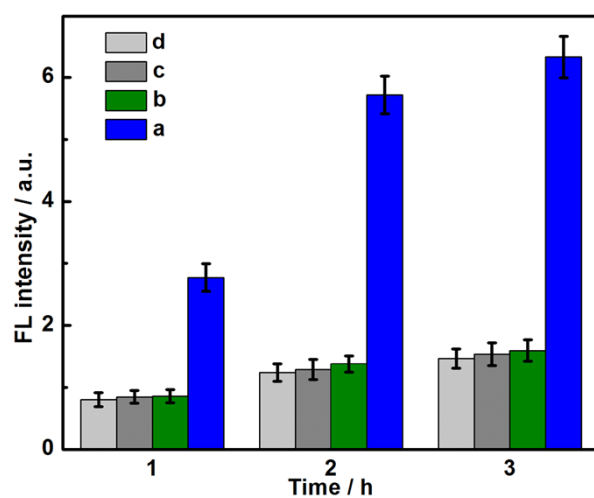

**Fig. S14** Confocal FL intensity of HepG2 cell transfected with  $200 \mu\text{g mL}^{-1}$  (a) f-CNNS and (b) CNNS, and (c) A549 and (d) HaCaT cell transfected with  $200 \mu\text{g mL}^{-1}$  f-CNNS at  $37^\circ\text{C}$  for 1, 2 and 3 h.

### Optimization of incubation time and amount of mf-CNNS probe for cell transfection

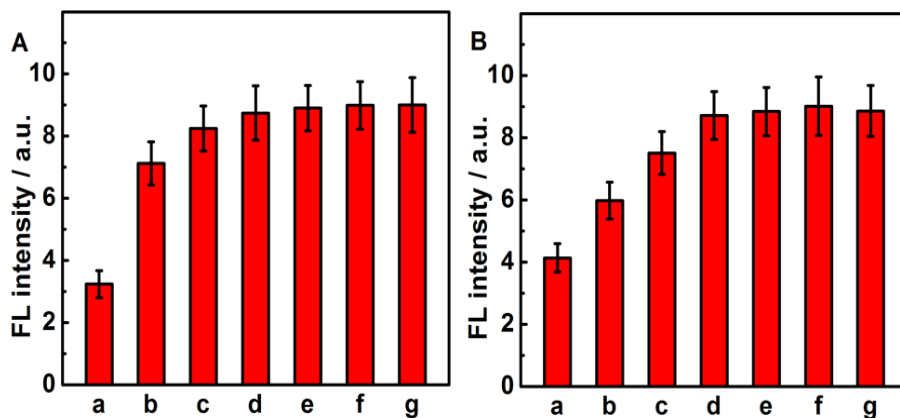

**Fig. S15** Confocal Cy5 FL intensity of HepG2 cell after incubation with (A) 200 µg mL<sup>-1</sup> mf-CNNS probe at 37 °C for 1, 2, 2.5, 3, 3.5, 4 and 5 h (from a to g), (B) 50, 100, 150, 200, 250, 300 and 350 µg mL<sup>-1</sup> mf-CNNS probe at 37 °C for 3 h (from a to g).

### Confocal microscopic analysis of intracellular miRNAs

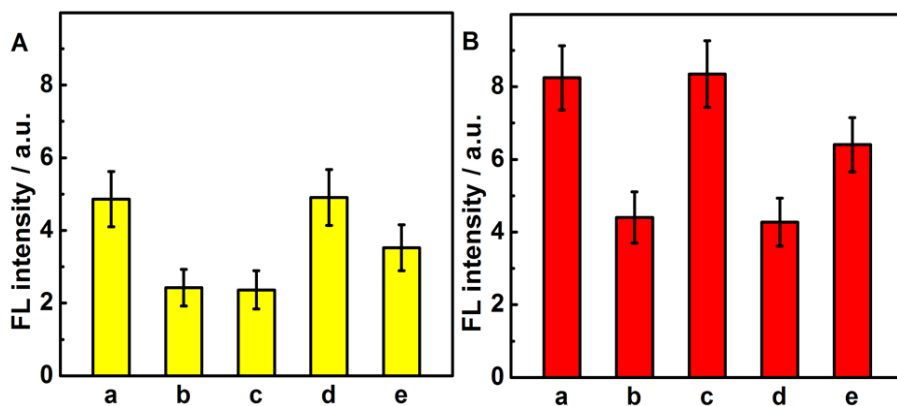

**Fig. S16** FL intensity of Cy3 (A) and Cy5 (B) from confocal microscopic analysis of HepG2 cells (a), HepG2 cells treated with 50 nM inhibitor-18a and inhibitor-224 (b), 50 nM inhibitor-224 (c), 50 nM inhibitor-18a (d) for 48 h, and HeLa cells (e), and then transfected with 200 µg mL<sup>-1</sup> mf-CNNS probe at 37 °C for 3 h.

## Flow cytometric analysis of intracellular miRNAs

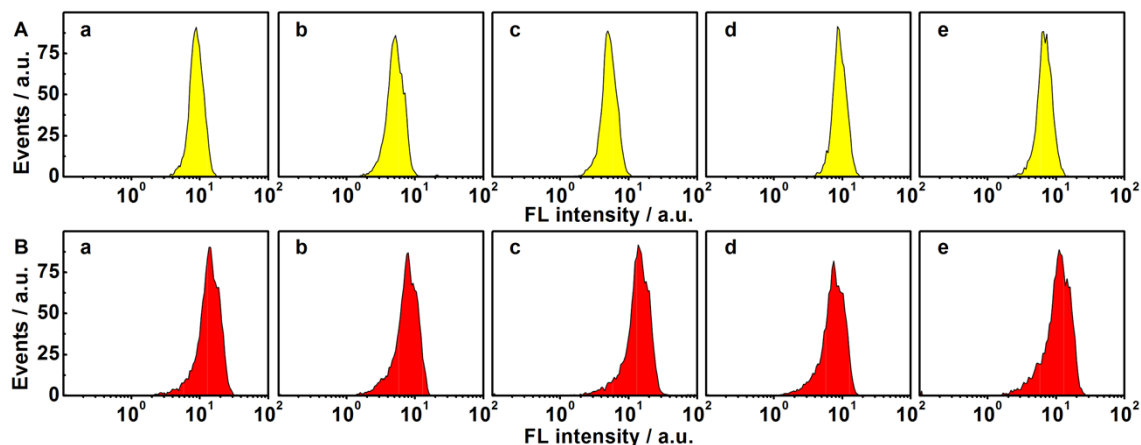

**Fig. S17** Histograms of Cy3 (A) and Cy5 (B) from flow cytometric analysis of HepG2 cells (a), HepG2 cells treated with 50 nM inhibitor-18a and inhibitor-224 (b), 50 nM inhibitor-224 (c), 50 nM inhibitor-18a (d) for 48 h, and HeLa cells (e), and then transfected with  $100 \mu\text{g mL}^{-1}$   $f_1$ - and  $f_2$ -CNNS probes at  $37^\circ\text{C}$  for 3 h, respectively.

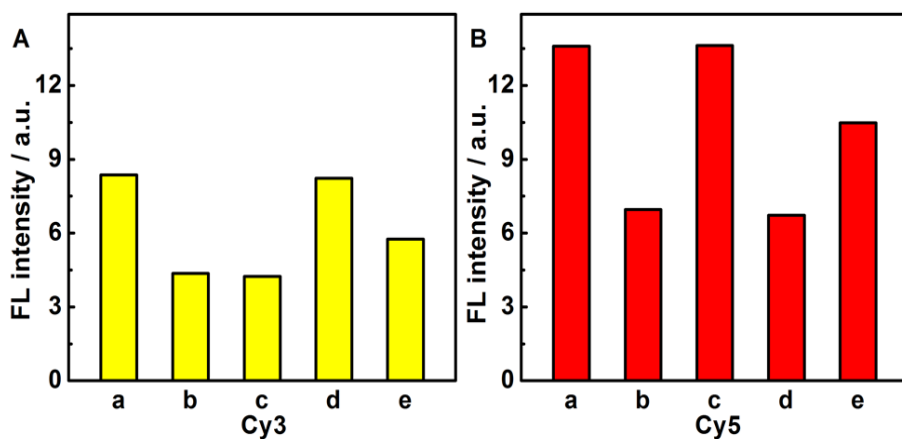

**Fig. S18** FL intensity of Cy3 (A) and Cy5 (B) from flow cytometric analysis of HepG2 cells (a), HepG2 cells treated with 50 nM inhibitor-18a and inhibitor-224 (b), 50 nM inhibitor-224 (c), 50 nM inhibitor-18a (d) for 48 h, and HeLa cells (e), and then transfected with  $100 \mu\text{g mL}^{-1}$   $f_1$ - and  $f_2$ -CNNS probes at  $37^\circ\text{C}$  for 3 h, respectively.

## Supporting references

[S1] X. M. Sun and Y. D. Li, *Angew. Chem. Int. Ed.*, 2004, **43**, 597–601.

- [S2] X. D. Zhang, X. Xie, H. Wang, J. J. Zhang, B. C. Pan and Y. Xie, *J. Am. Chem. Soc.*, 2013, **135**, 18–21.
- [S3] (a) E. Heister, V. Neves, C. Tîlmaciu, K. Lipert, V. S. Beltrán, H. M. Coley, S. R. P. Silva and J. McFadden, *Carbon*, 2009, **47**, 2152–2160; (b) Q. B. Wang, W. Wang, J. P. Lei, N. Xu, F. L. Gao and H. X. Ju, *Anal. Chem.*, 2013, **85**, 12182–12188.
